# Supplementary material for: Targeted Transfection Using PEGylated Cationic Liposomes Directed Towards P-Selectin Increases siRNA Delivery into Activated Endothelial Cells
Source: PubMed Central journal article supplement (PMC6359248; doi:10.3390/pharmaceutics11010047), 2019-01-21
Supplement: pharmaceutics-11-00047-s001.pdf [file pharmaceutics-11-00047-s001.pdf]

# Targeted Transfection Using PEGylated Cationic Liposomes Directed Towards P-Selectin Increases siRNA Delivery into Activated Endothelial Cells

Cristina Ana Constantinescu <sup>1,2</sup>, Elena Valeria Fuior <sup>1</sup>, Daniela Rebleanu <sup>1</sup>, Mariana Deleanu <sup>1,3</sup>, Viorel Simion <sup>1</sup>, Geanina Voicu <sup>1</sup>, Virginie Escriou <sup>4,5,6,7</sup>, Ileana Manduteanu <sup>1</sup>, Maya Simionescu <sup>1</sup> and Manuela Calin <sup>1,\*</sup>

- <sup>1</sup> Institute of Cellular Biology and Pathology "Nicolae Simionescu," Bucharest 050568, Romania; cristina.constantinescu@icbp.ro (C.A.C.); elena.fuior@icbp.ro (E.V.F.); daniela.rebleanu@icbp.ro (D.R.); mariana.deleanu@icbp.ro (M.D.); viorel.simion@icbp.ro (V.S.); geanina.voicu@icbp.ro (G.V.); ileana.manduteanu@icbp.ro (I.M.); maya.simionescu@icbp.ro (M.S.)
  - <sup>2</sup> University of Agronomic Sciences and Veterinary Medicine (UASVM), Faculty of Veterinary Medicine, Bucharest 050097, Romania
  - <sup>3</sup> University of Agronomic Sciences and Veterinary Medicine (UASVM), Faculty of Biotechnologies, Bucharest 011464, Romania
  - <sup>4</sup> Centre National de la Recherche Scientifique (CNRS), Unité de Technologies Chimiques et Biologiques pour la Santé (UTCBS) UMR 8258, Paris 75006, France; virginie.escriou@parisdescartes.fr
  - <sup>5</sup> Institut National de la Santé et de la Recherche Médicale (INSERM), Unité de Technologies Chimiques et Biologiques pour la Santé (UTCBS) U 1022, Paris 75006, France;
  - <sup>6</sup> Université Paris Descartes, Sorbonne-Paris-Cité University, Unité de Technologies Chimiques et Biologiques pour la Santé (UTCBS), Paris 75006, France
  - <sup>7</sup> Chimie ParisTech, PSL Research University, UTCBS, Paris 75005, France
- \* Correspondence: [manuela.calin@icbp.ro](mailto:manuela.calin@icbp.ro); Tel: +4021-319-45-18; Fax: +4021-319-45-19

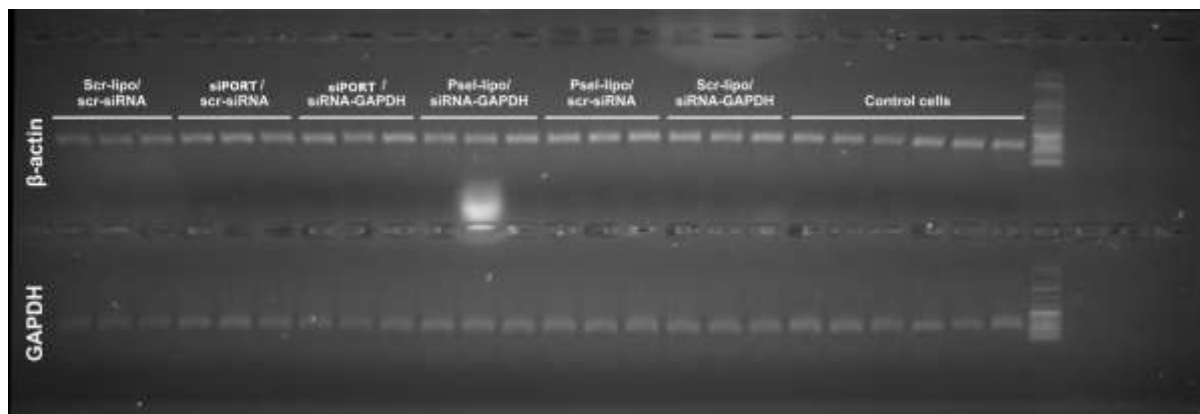

**Supplementary Figure 1.** The expression of GAPDH and  $\beta$ -actin mRNA in b.End3 cells determined at 48 hours after transfection with different lipoplexes at a charge ratio +/- of 4 and 100 nM siRNA. Legend: Scr-lipo: non-targeted liposomes; Psel-lipo: P-selectin targeted liposomes; scr-siRNA: scrambled siRNA; siRNA-GAPDH: siRNA specific for GAPDH; siPORT: siPORT™ NeoFX transfection vector.
